# Supplementary material for: Electrospinning preparation and adsorption properties of mesoporous alumina fibers
Source: Royal Society of Chemistry journal article supplement (doi:10.1039/c3ta10955k), 2013-01-01
Supplement: c3ta10955k.pdf [file c3ta10955k.pdf]

Electronic Supplementary Information for

## Electrospinning preparation and adsorption property of mesoporous alumina fibers

Yan Wang, Wei Li, Xiuling Jiao\* and Dairong Chen\*

*School of Chemistry & Chemical Engineering, National Engineering Research Center for colloidal materials, Shandong University, Jinan 250100, P.R. China. Fax: +86-531-88364281; Tel: +86-531-88364280; E-mail: jiaoxl@sdu.edu.cn*

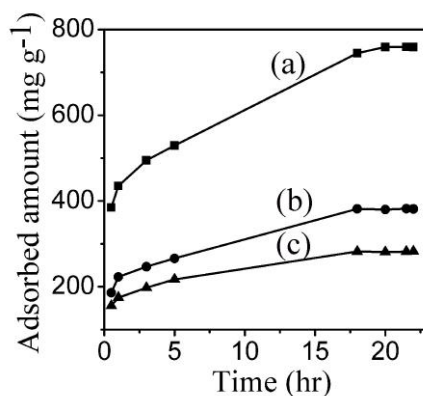

**Fig. S1** The adsorption amount of mesoporous alumina fibers toward Congo red as a function of adsorption time. The fibers were obtained at 700 °C (a), 800 °C (b) and 900 °C (c). Initial Congo red concentration (a) 900 mg L<sup>-1</sup>, (b) 500 mg L<sup>-1</sup>, (c) 500 mg L<sup>-1</sup>.

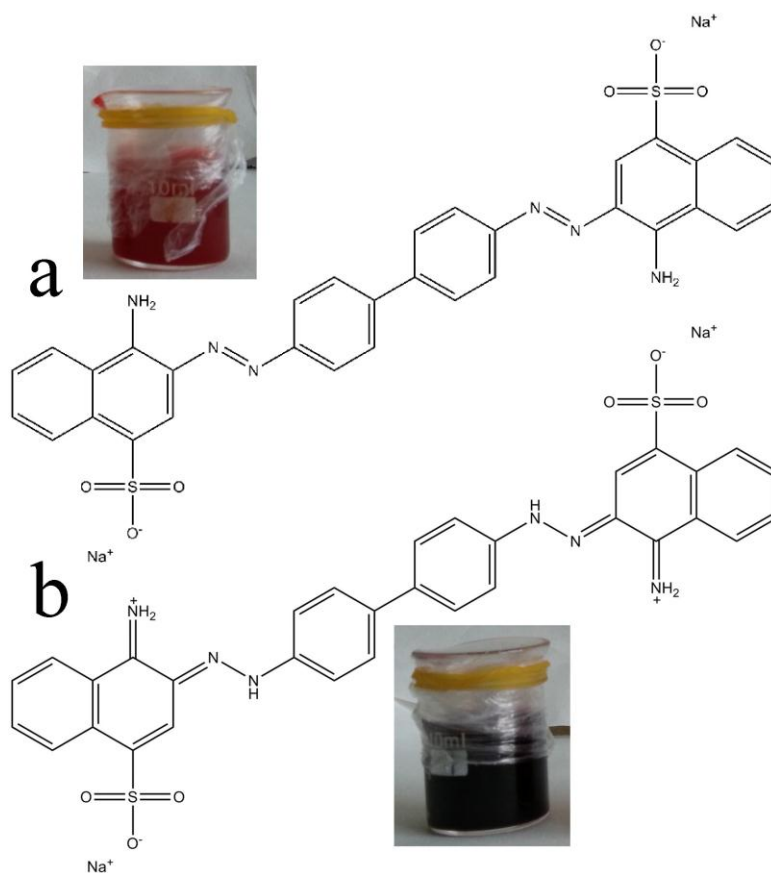

**Fig. S2** The structural formula and color of red form in alkaline solution (a) and bluish violet in acidic solution (b) of Congo red.

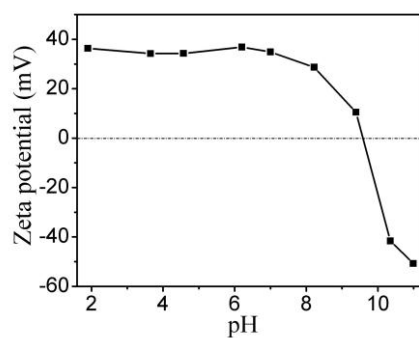

**Fig. S3** Zeta potentials of alumina samples calcined at 700 °C as a function pH value.
